# Supplementary material for: Hot pressing-induced alignment of hexagonal boron nitride in SEBS elastomer for superior thermally conductive composites
Source: PubMed Central journal article supplement — RSC Adv. 2018 Jul 18;8(45):25835–45. doi: 10.1039/c8ra04700f (PMC9082571; doi:10.1039/c8ra04700f), 2018-07-18
Supplement: RA-008-C8RA04700F-s001.pdf [file RA-008-C8RA04700F-s001.pdf]

**Electronic Supplementary Information for**  
**Hot-pressing induced alignment of hexagonal boron nitride in SEBS**  
**elastomer for superior thermally-conductive composites**

Cuiping Yu,<sup>abc</sup> Wenbin Gong,<sup>b</sup> Jun Zhang,<sup>b</sup> Weibang Lv,<sup>b</sup> Wei Tian,<sup>\*a</sup> Xiaodong  
Fan,<sup>a</sup> Yagang Yao<sup>\*bc</sup>

<sup>a</sup> The Key Laboratory of Space Applied Physics and Chemistry, Ministry of Education  
and Shaanxi Key Laboratory of Macromolecular Science and Technology, School of  
Science, Northwestern Polytechnical University, Xi'an 710072, PR China.

<sup>b</sup> Division of Advanced Nanomaterials, Key Laboratory of Nanodevices and  
Applications, Joint Key Laboratory of Functional Nanomaterials and Devices, CAS  
Center for Excellence in Nanoscience, Suzhou Institute of Nano-tech and Nano-  
bionics, Chinese Academy of Sciences, Suzhou 215123, PR China.

<sup>c</sup> Division of Nanomaterials, Suzhou Institute of Nano-Tech and Nano-Bionics,  
Nanchang, Chinese Academy of Sciences, Nanchang 330200, PR China.

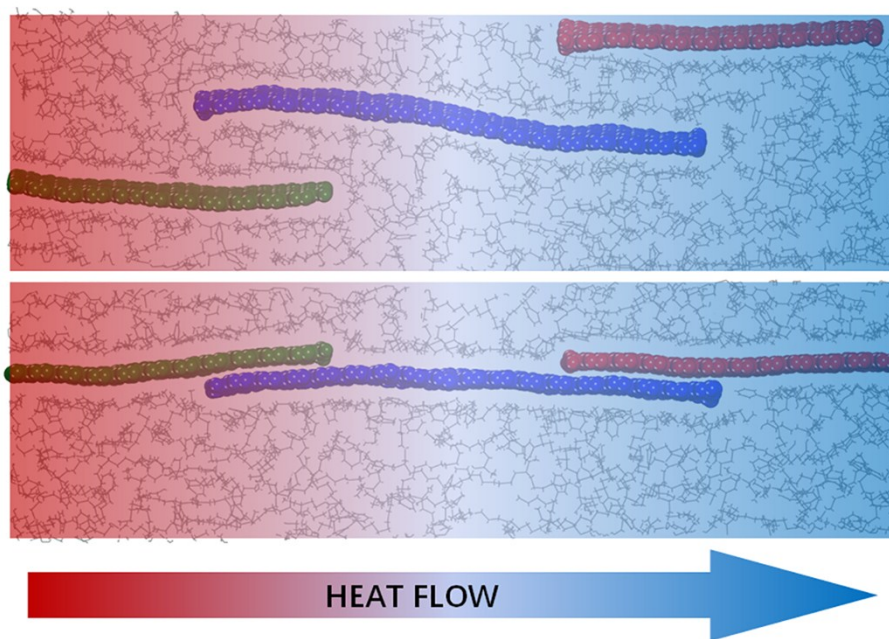

**Fig. S1** Illustration of rNEMD to calculate the thermal conductivity. The red, blue and green present three individual hBN molecules, and the grey presents the SEBS matrix.

**Table S1** Force field settings employed in the simulations

| species | intramolecular interaction | intermolecular interaction | atomic charge         | L-J parameters                          |
|---------|----------------------------|----------------------------|-----------------------|-----------------------------------------|
| SEBS    | Airebo                     | Lennard-Jones potential    | /                     | $\sigma$ : 3.4 Å<br>$\epsilon$ : 0.2 eV |
| hBN     | Tersoff                    | coulomb potential          | N: 0.6 e<br>B: -0.6 e | /                                       |

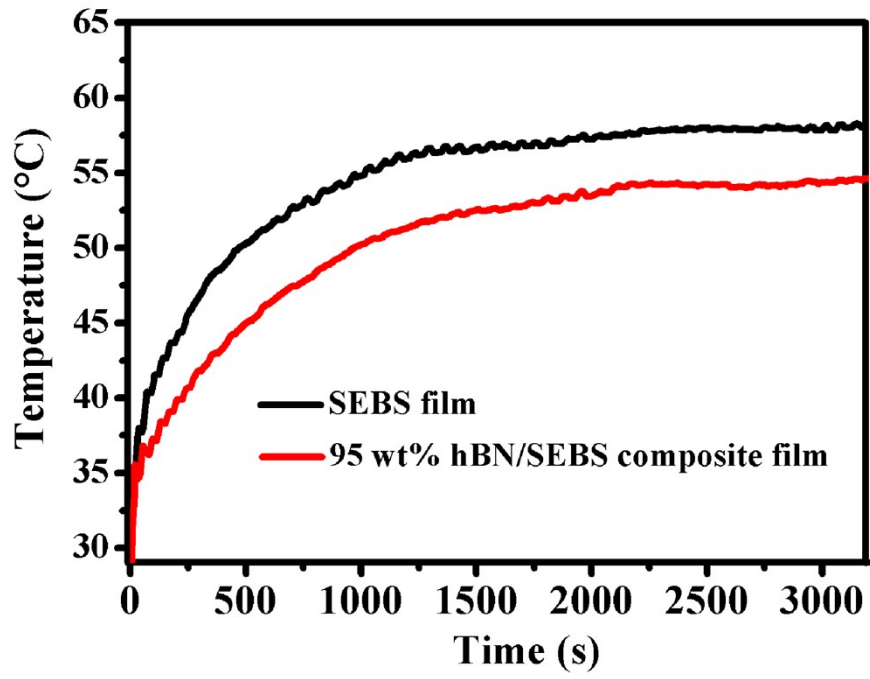

Fig. S2 Temperature variation of the working CPU.
